# Supplementary material
Source: publisher site journal article supplement (https://www.degruyterbrill.com/publication/isbn/9783839424322/downloadAsset/9783839424322_Leseprobe.pdf)
Supplement: Supplementary file 1 [file 9783839424322_Leseprobe.pdf]

**Aus:**

*Ursula Kramer (Hg.)*

## **Theater mit Musik**

400 Jahre Schauspielmusik im europäischen Theater.  
Bedingungen – Strategien – Wahrnehmungen

Mai 2014, 466 Seiten, kart., zahlr. Abb., 44,99 €, ISBN 978-3-8376-2432-8

Wiewohl konstitutiv für das europäische Theater seit der Antike, findet die Musik im Schauspiel erst in jüngerer Zeit überhaupt Beachtung. Dieser Band widmet sich erstmals ausschließlich dem raum- wie zeitumspannenden Phänomen von Theater *mit* Musik. Die historisch wie methodisch äußerst unterschiedlich verorteten Aufsätze bieten einen Einblick in die vielfältigen Realisierungen im Kontext spezifischer Theaterrealitäten einer über 400-jährigen Geschichte, der kulturellen Praxis in den verschiedenen europäischen Theaterzentren sowie des Kulturtransfers und fragen nach ihrem jeweiligen Bezug im intermedialen Gesamtereignis einer Aufführung.

**Ursula Kramer** (Prof. Dr.) lehrt Musikwissenschaft an der Johannes Gutenberg-Universität Mainz.

Weitere Informationen und Bestellung unter:  
[www.transcript-verlag.de/978-3-8376-2432-8](http://www.transcript-verlag.de/978-3-8376-2432-8)

# INHALT

|                         |          |
|-------------------------|----------|
| <b>Einleitung .....</b> | <b>9</b> |
|-------------------------|----------|

## **SCHAUSPIELMUSIK VON DER FRÜHEN NEUZEIT BIS ZUM KLASSISCH-ROMANTISCHEN ZEITALTER**

|                                                                                                                   |           |
|-------------------------------------------------------------------------------------------------------------------|-----------|
| <b>Schauspielmusik im deutschen Sprachraum (1500 bis 1700).<br/>Ergebnisse eines DFG-Forschungsprojekts .....</b> | <b>19</b> |
|-------------------------------------------------------------------------------------------------------------------|-----------|

IRMGARD SCHEITLER

|                                                                                     |           |
|-------------------------------------------------------------------------------------|-----------|
| <b>Barocke Wandertruppen – Opern- und Schauspielmusik.<br/>Zwei Beispiele .....</b> | <b>49</b> |
|-------------------------------------------------------------------------------------|-----------|

RASHID-S. PEGAH

|                                                                                                              |           |
|--------------------------------------------------------------------------------------------------------------|-----------|
| <b>Schauspielmusik in der „klassischen“ Provinz.<br/>Zum Weimarer Theater unter Goethe (1791-1817) .....</b> | <b>69</b> |
|--------------------------------------------------------------------------------------------------------------|-----------|

BEATE AGNES SCHMIDT

|                                                                                                                                         |           |
|-----------------------------------------------------------------------------------------------------------------------------------------|-----------|
| <b>Das K.K. Hofburgtheater, die Vorstadtbühnen<br/>und die unendliche Vielfalt der Gestaltung<br/>von Schauspielmusik in Wien .....</b> | <b>93</b> |
|-----------------------------------------------------------------------------------------------------------------------------------------|-----------|

TILL GERRIT WAIDELICH

|                                                                                      |            |
|--------------------------------------------------------------------------------------|------------|
| <b>Schauspielmusik in den historischen Beständen<br/>des Coburger Theaters .....</b> | <b>119</b> |
|--------------------------------------------------------------------------------------|------------|

ANGELIKA TASLER

**„Zur Veredelung und Verschönerung des Theaters“ –  
Thesen zur Schauspielmusikpraxis im deutschsprachigen  
Kulturraum in der zweiten Hälfte des 19. Jahrhunderts .....129**

ANTJE TUMAT

**SCHAUSPIELMUSIK IN EUROPA JENSEITS DER GRENZEN  
DES DEUTSCHSPRACHIGEN THEATERS**

**Schauspielmusik in Spanien vor Lope de Vega .....151**

STEPHANIE KLAUK

**Schauspielmusik in Italien um 1800.  
Eine Spurensuche .....171**

MARTINA GREMLER

***Musik til Skuespil* – Two Methodological Challenges and  
a Few Observations Occasioned by an Early Nineteenth-  
Century Danish Manuscript of Incidental Music .....183**

JENS HESSELAGER

**Musik des Stockholmer Unterhaltungstheaters um 1850 –  
Strategien des Einfachen.....203**

SABINE STÖLTING

**Schauspielmusik als Möglichkeitsraum.  
Zur Schauspielmusikpraxis in Norwegen um 1900 .....217**

LILLI MITTNER

**Schauspielmusik im England des 19. Jahrhunderts  
am Beispiel von Arthur Sullivan.  
Forschungsstand und Desiderata .....247**

MEINHARD SAREMBA

**Französische Schauspielmusik während  
der Epoche Jules Massenets .....263**

HERBERT SCHNEIDER

## **SCHAUSPIELMUSIK UND MUSIKALISIERUNG VON THEATER IM 20. JAHRHUNDERT**

|                                                                                                       |            |
|-------------------------------------------------------------------------------------------------------|------------|
| <b>Musik im Sprechtheater des frühen 20. Jahrhunderts –<br/>Grundsätzliches zur Spurensuche .....</b> | <b>301</b> |
|-------------------------------------------------------------------------------------------------------|------------|

BENJAMIN SCHOLTEN

|                                                                                                            |            |
|------------------------------------------------------------------------------------------------------------|------------|
| <b>Der Regisseur, das Drama und die Musik:<br/>Max Reinhardts musikalische <i>Faust</i>-Visionen .....</b> | <b>315</b> |
|------------------------------------------------------------------------------------------------------------|------------|

URSULA KRAMER

|                                                                   |            |
|-------------------------------------------------------------------|------------|
| <b>Die Musik Hanns Eislers zu Stücken von Bertolt Brecht.....</b> | <b>341</b> |
|-------------------------------------------------------------------|------------|

INGEBORG ALLIHN

|                                                                                                                                   |            |
|-----------------------------------------------------------------------------------------------------------------------------------|------------|
| <b>Pierre Boulez und seine Arbeiten für<br/>die Compagnie Renaud-Barrault.<br/>Zur Bühnenmusik der <i>Orestie</i> (1955).....</b> | <b>355</b> |
|-----------------------------------------------------------------------------------------------------------------------------------|------------|

MARTIN ZENCK

|                                                        |            |
|--------------------------------------------------------|------------|
| <b>Musik in den Bühnenwerken von Peter Hacks .....</b> | <b>395</b> |
|--------------------------------------------------------|------------|

GUNTHER NICKEL

|                                                                                                                                                      |            |
|------------------------------------------------------------------------------------------------------------------------------------------------------|------------|
| <b>Musikalische Rauminszenierungen.<br/>Zum Verhältnis von Musik und Szene bei Max Reinhardt,<br/>Klaus Michael Grüber und Heiner Goebbels .....</b> | <b>409</b> |
|------------------------------------------------------------------------------------------------------------------------------------------------------|------------|

CONSTANZE SCHULER

|                                                                                                                                                                      |            |
|----------------------------------------------------------------------------------------------------------------------------------------------------------------------|------------|
| <b>Schauspiel- und Hörspielmusik: Überlegungen zu<br/>ihrem Verhältnis am Beispiel von Johan Simons’<br/>„bimedialer“ Inszenierung <i>Die Perser</i> (2011).....</b> | <b>433</b> |
|----------------------------------------------------------------------------------------------------------------------------------------------------------------------|------------|

MICHAEL BACHMANN

|                                                                    |            |
|--------------------------------------------------------------------|------------|
| <b>Musik als Matrix für Spiel und Schau –<br/>LOSE COMBO .....</b> | <b>453</b> |
|--------------------------------------------------------------------|------------|

FRIEDEMANN KREUDER

|                                     |            |
|-------------------------------------|------------|
| <b>Autorinnen und Autoren .....</b> | <b>457</b> |
|-------------------------------------|------------|

## Einleitung

---

„Eine Oper hört man überall beynahe als  
eben dasselbe Kunstwerk; die Schauspiele  
dagegen klingen auf jedem Theater anders,  
so dass man sie oft nicht wiedererkennt.“

Ihrer rhetorischen Zuspitzung zum Trotz hat Goethes Erkenntnis über die spezifische Seinsweise von Schauspielen, formuliert als Antagonismus zur Gattung Oper, bis in die Gegenwart hinein ihre grundsätzliche Gültigkeit bewahrt. Gleichwohl die Essenz der Theaterrealität der eigenen Epoche beschreibend, enthielten Goethes Worte darüber hinaus auch ein prophetisches Potential: Ihnen wuchs insbesondere im Verlauf des 20. Jahrhunderts auch weit über das eigene dramatische Œuvre des Autors hinaus verstärkt Bedeutung zu, und dies nicht zuletzt im Zusammenhang mit den neuen technischen Möglichkeiten zur Erzeugung der klanglichen Dimension von Theateraufführungen. Die bereits 1817 in Weimar konstatierte Nicht-Identität eines Schauspiels durch seine diversen musikalischen Aneignungen an den verschiedenen Bühnen erscheint heutzutage nochmals gesteigert. So unterscheiden sich nicht nur die Bühnenproduktionen des *Faust* in den verschiedenen szenisch-musikalischen Lesarten eines Dieter Dorn (1991), Peter Stein (2000) oder Nicolas Stemmann (2011) – mit Musiken von Roger Jannotta, Arturo Anecchino bzw. Thomas Küstner und Sebastian Vogel – erheblich, auch Michael Thalheimers jüngste Frankfurter *Medea*-Produktion mit der Musik von Bert Wrede (2012) macht aus dem Euripides-Drama etwas völlig Anderes als das Wiener *Medea*-Projekt von Grzegorz Jarzyna (Musik: Jacek Grudzien, 2006) oder die Chortheater-Fassung von Volker Lösch in Stuttgart (2007).

Dabei birgt die zunehmende Entkopplung der klanglich-akustischen Dimension vom (re)produzierenden Schauspielermusiker jenseits der ästhetischen Ebene in der Theaterpraxis auch eine pragmatische (weil kostensenkende) Komponente, was nicht zuletzt auch an kleineren Theatern den Einsatz elektronischer Musik im Sinn einer „Klangkonserve“ begünstigt haben dürfte. Und an Häusern,

die nach wie vor „reale“ Musiker für die Schauspielmusik beschäftigen, spielt mehr denn je auch das Phänomen der Improvisation eine wesentliche Rolle. Die bereits von Goethe konstatierte Flüchtigkeit, die die klangliche Realisation des Schauspiels schon im frühen 19. Jahrhundert kennzeichnete, differenziert sich demnach heutzutage dank der technischen Medien noch weiter aus und führt zu einer unüberschaubaren Vielfalt an individuellen klanglichen Realisierungen des ursprünglichen Dramas: Mit eben dieser Flüchtigkeit des Mediums Schauspielmusik korrespondiert ihr Status eines „Aufführungstextes“ – im Gegensatz zum „Werktext“, wie ihn Goethe für die Oper realisiert sah.

Genau hier scheint denn auch der wesentliche Grund dafür zu liegen, dass die Schauspielmusik von der musikwissenschaftlichen Forschung allzu lange ausgeblendet wurde und nun eines der letzten großen Desiderate im Bereich der Theatermusik bildet. Einerseits ließ der Mangel an Werkhaftigkeit die Gattung scheinbar allzu sehr im Usuellen aufgehen, als dass ihre nähere Inaugenscheinnahme von Interesse gewesen wäre. Zum anderen bedingt die transitorische Seinsweise des Genres eine außerordentliche Fülle an (scheinbar minorem, dazu äußerst peripher überliefertem) Aufführungsmaterial, das zu sichten und einer kritischen Aufarbeitung zu unterziehen man bislang weitestgehend unterlassen hat.

Anders liegt der Fall für das klassisch-romantische Zeitalter; hier haben die universitären Forschungsinitiativen von Weimar-Jena sowie Heidelberg-Stuttgart einige grundlegende Einzelstudien hervorgebracht, die als faktisch belastbare Referenzen dazu einladen, vergleichbare Untersuchungen für andere Theater mit abweichenden Protagonisten durchzuführen. Darüber hinaus waren Studien zur Schauspielmusik bislang stets singulären Initiativen und Interessen mit individuellen und spezifischen Fragestellungen zu verdanken.

Vor diesem Hintergrund fand am 15./16. Juni 2012 am Musikwissenschaftlichen Institut der Johannes Gutenberg-Universität in Mainz ein zweitägiger Workshop statt, der genau jene Kolleginnen und Kollegen miteinander in fachlichen Austausch bringen wollte, die sich in unterschiedlichen Konstellationen bereits mit dem Thema befassen bzw. befasst haben. Neben Fallstudien mit methodisch wie inhaltlich innovativem und für weitere Forschungen anregendem Potential trat die Präsentation langfristiger Forschungsprojekte, letztere sowohl retrospektiv, wesentliche, generelle Erkenntnisse zusammenfassend, als auch prospektiv, auf weitere, bislang unbeachtete Sammlungen hinweisend. Der vorliegende Band folgt in seiner Disposition dem Ablauf des Workshops, der ebenfalls in drei verschiedene historisch-thematische Sektionen gegliedert war:

## Schauspielmusik

- von der frühen Neuzeit bis zum klassisch-romantischen Zeitalter
- in Europa jenseits der Grenzen des deutschsprachigen Theaters
- und Musikalisierung von Theater im 20. Jahrhundert.

Während die jüngeren musikwissenschaftlichen Arbeiten zu den Dramen des klassisch-romantischen Zeitalters, insbesondere zu Goethe und Schiller, inzwischen auch die Wahrnehmung seitens der Literaturwissenschaft zu verändern beginnt, stellte die Epoche des deutschen Barockdramas diesbezüglich bislang eine riesige terra incognita dar. Wie die umfänglichen Forschungen von Irmgard Scheitler zeigen, hat man für mindestens 90% der Dramenproduktion zwischen 1500 und 1700 von einer Beteiligung durch Musik auszugehen; diese ist i.d.R. nur indirekt zu erschließen. Der Bandbreite theatraler Aufführungskonstellationen (Schule, Höfe, Bürger, Wandertruppen) entspricht eine Fülle unterschiedlicher musikalischer Realisierungen. Darüber hinaus lassen sich auch aus soziologischer Perspektive wichtige Erkenntnisse, bspw. die Mitwirkung bestimmter gesellschaftlicher Gruppen betreffend, gewinnen. In seinem quellenkundlich verorteten Beitrag thematisiert Rashid-S. Pegah zwei Fallbeispiele wandernder Truppen in der ersten Hälfte des 18. Jahrhunderts und fügt in der Kombination wichtiger älterer Forschungsliteratur und neu aufgefundener archivalischer Dokumente Mosaiksteine für die mühsame Rekonstruktion dieser seinerzeit bedeutenden Theaterpraxis zusammen. Die Theaterwerkstatt Goethes umfassend in den Blick nehmend, arbeitet Beate Agnes Schmidt das spezifische Profil Weimarer Schauspielmusikproduktion heraus und bietet eine Zusammenschau aller unter seiner Ägide von den ortsansässigen Konzertmeistern bzw. Kapellmeistern komponierten und arrangierten Weimarer Kompositionen. Am Beispiel des *Wallenstein* wird schließlich einmal mehr die Praxis der divergierenden „Aufführungstexte“ (Austausch von musikalischen Übernahmen bei verschiedenen Inszenierungen) erörtert, die die Autorin nicht nur produktions-, sondern ebenso rezeptionsästhetisch deutet. Der außerordentlichen Vielfalt, die die Wiener Theaterpraxis im frühen 19. Jahrhundert nicht zuletzt in Hinblick auf die Optionen der Musik im Schauspiel bereithielt, begegnet Till Gerrit Waidelich in zwei Ansätzen. Zunächst thematisiert er spezifische Aspekte, wie die räumliche Beschaffenheit der Theater, die Möglichkeiten und Grenzen damaliger Bühnentechnik, spricht Fragen der Editionsproblematik von Schauspielmusik an, bevor er im Folgenden bislang unberücksichtigte zeitgenössische Quellen ins Zentrum der Analyse rückt: Neben autobiographischen Äußerungen einer Darstellerin und einem Schreiben der Theateradministration ist vor allem eine genaue Auflistung über Wahl und Adaption von Kompositionen zu spezi-

fischen Theateraufführungen aufschlussreich, finden sich hier doch die sonst so selten dokumentierten Zuordnungen von präexistenter Musik zu individuellen Schauspielaufführungen. Als intakte, von ihrem Aufbau im Jahr 1827 an von späteren äußeren Eingriffen wie Kriegsverlusten verschont gebliebene Theaterbibliothek präsentiert Angelika Tasler den Musikalienbestand des Hoftheaters Coburg am Beispiel der Werkgruppe „Einlagen“, die – bislang wissenschaftlich ungenutzt – speziell für die Schauspielmusik von einigem Interesse sein dürfte. Antje Tumat widmet sich dem auch von der jüngeren Forschung zur Schauspielmusik bislang nur punktuell beachteten Zeitraum der zweiten Hälfte des 19. Jahrhunderts, und es gelingt ihr, das gängige (ältere) Bild des Verfalls zu widerlegen und anhand einiger Fallbeispiele durch eine deutlich differenzierte Sicht damaliger Theaterrealitäten zu ersetzen: Demnach kam es weniger zu einem globalem Niedergang bestehender Traditionen als vielmehr zur Umorientierung, indem die einzelnen Theater durchaus unterschiedliche Praktiken im Umgang mit der Musik im Schauspiel pflegten.

Die Bandbreite der in der zweiten Sektion diskutierten Beispiele schauspielmusikalischer Aktivitäten jenseits des deutschsprachigen Theaters reicht vom 16. bis ins frühe 20. Jahrhundert und macht deutlich, dass dem Thema auch als gesamteuropäisches Phänomen eine bislang noch nicht einmal in Ansätzen realisierte Bedeutung zukommt. Für Spanien rekonstruiert Stephanie Klauk die Anfänge der Theatermusik im 16. Jahrhundert und stellt die herausragende Bedeutung präexistenter (Vokal)musik heraus. Dabei ergeben sich methodische Parallelen zu den Forschungen zum zeitgleichen deutschsprachigen Drama (Scheitler): Auch für das spanische Drama erweist sich die indirekte Erschließung der Musikbeteiligung durch Rekonstruktion über Versmaße und Abgleich mit zeitgenössischen musikalischen Quellen als adäquate Methode. Speziell im religiösen Drama wächst der Kontrafaktur zusätzlich ein konfessionelles wie nationales Moment von Identitätsstiftung zu.

Möglicherweise stellt sich für Italien als Land der Oper die Bedeutung von Schauspielmusik anders dar als für das restliche Europa: Martina Grempler zeigt das Land gleichsam als weißen Fleck auf der europäischen Landkarte des Theaters mit Musik, das es vor allem durch Rezeptionsdokumente zu erforschen gilt. Ausgehend von theoretischen Äußerungen aus dem späten 18. und frühen 19. Jahrhundert erörtert die Autorin auch die Möglichkeit einer bewussten Abgrenzung zur Oper und zur Musik für die Zeit vor dem 20. Jahrhundert. Der Beitrag zum dänischen Theater von Jens Hesselager verknüpft Aspekte der methodischen Diskussion mit der exakten Lektüre einer zentralen Sammlung von Schauspielmusik aus der Bibliothek des Königlichen Theaters in Kopenhagen



aus dem 19. Jahrhundert. Eine typologische Differenzierung zwischen Oper und Schauspiel und die daraus resultierende Positionsbestimmung von Musik im Drama gerät zusehends in produktive Auseinandersetzung mit dem Befund der in der Sammlung notierten Kompositionen (Kanonbildung, Kulturtransfer). Auch im schwedischen Unterhaltungstheater des 19. Jahrhunderts spielte Musik eine wichtige Rolle; Sabine Stölting weist anhand der Arbeitsbiographien zweier in Stockholm wirkender Komponisten auf die Bedeutung der Produktionsbedingungen von Inszenierungen hin: Strategien des Einfachen waren demnach zumindest in dem von der Autorin untersuchten Dramensegment eine *conditio sine qua non* alltäglicher Theaterpraxis. Die spezifischen Chancen einer „späten“ Nation arbeitet Lilli Mittner in ihrem dem Christiania-Theater in Oslo gewidmeten Beitrag für Norwegen heraus. Zu einer Zeit, als das Musikleben andernorts in Europa längst von einer Expertenkultur vereinnahmt war, boten sich an einem geographisch weniger standardisierten Ort eigene Möglichkeiten zur Erprobung künstlerischer Praktiken: Exemplarisch widmet sich die Verfasserin den Kompositionen zweier Komponistinnen im Spannungsfeld des Gender-Diskurses. Rückgewinnung einer zwischenzeitlich verlorenen Deutungshoheit als eigenständige Musiknation lautete unter anderem die Aufgabe auch für den Engländer Arthur Sullivan, die dieser nicht zuletzt in mehreren großformatigen Schauspielmusikprojekten realisierte. Meinhard Saremba gibt einen Überblick über die sieben Theatermusiken Sullivans, unter denen insbesondere den Kompositionen zu Shakespeare-Dramen eine herausragende Stellung zukommt. Ausgehend von der geradezu eklatant zu nennenden Diskrepanz zwischen der massenhaften Verwendung von Musik bei Schauspielaufführungen einerseits und dem gegenwärtigen defizitären Forschungsstand in Frankreich andererseits verfolgt Herbert Schneider eine zweifache Intention: Zunächst greift er die grundlegende Studie von Peter Lamothe aus dem Jahr 2008 (*Theatre Music in France 1864-1964*) auf, der es vor allem um die historischen Rahmenbedingungen von Theaterproduktionen ging, und ergänzt und berichtigt Lamothes umfangreichen Katalog. Im Anschluss diskutiert er 15 exemplarische Kompositionen französischer Schauspielmusik aus der Zeit zwischen 1872 und 1925. Was im Grunde auf alle Beiträge gleichermaßen zutrifft, wird hier am exemplarischen historischen Ausschnitt in besonderem Maße augenfällig: Die Liste der Desiderate für zukünftige Forschungen ist mehr als üppig.

Das 20. Jahrhundert nimmt im historischen Längsschnitt gleich aus mehreren Gründen eine Sonderstellung ein. An seinem Beginn stehen nicht nur die optisch-szenischen Innovationen, die der realistisch-naturalistischen Ausrichtung der zurückliegenden Jahrzehnte eine neue Ästhetik entgegensetzten, sondern vor

allem auch das Aufkommen des Regisseurs im modernen Wortsinn, dem als intellektuellem Zentrum der Inszenierung ein bis dato ungekanntes Machtpotential zuwächst, zu dessen Einflussbereich grundsätzlich auch die klingende Dimension einer Produktion gehörte. Hatten die Komponisten in den zurückliegenden Jahrhunderten gleichsam selbstverständlich ihren Anteil am plurimedialen Gefüge einer Schauspielerproduktion im Sinn des weit über Wagner hinausreichenden Gesamtkunstwerks als Teil eines synthetisierenden Gesamtereignisses verstanden, so zeigten die episierenden Theaterformen erstmals alternative Optionen für die musikalische Dimension auf: Eine homologe Gesamtstruktur war nun keinesfalls mehr selbstverständlich oder gar zwingend. Dies tangierte auch die angestammten Hierarchien der beteiligten Medien; nicht länger gingen Musik und Klang in einer Art „Hilfsfunktion“ für das logoszentrierte Drama auf; dieses wiederum wurde seinerseits hinterfragt und punktuell gar preisgegeben, wodurch sich auch die Rolle der flankierenden musikalischen Dimension änderte. Das Verhältnis der Einzelkünste zueinander wurde neu verhandelt. Experimentelle Theaterformen suchten sich ihre eigenen Räume jenseits der Mauern institutionalisierter Staats- oder Stadttheater, und dafür standen ihnen längst auch innovative Möglichkeiten einer elektronischen Klangerzeugung zur Verfügung: Theater mit Musik ist inzwischen zu einem Sammelbegriff für eine pluralistische Landschaft unterschiedlichster Formen künstlerischen Miteinanders der verschiedenen Medien und Elemente geworden.

Die dem dritten Themenschwerpunkt (20. Jahrhundert) des vorliegenden Bandes gewidmeten Beiträge spiegeln derartige Heterogenität unmittelbar wider. Benjamin Scholten zeigt zum einen die aus einem gewandelten Kräfteverhältnis resultierende Forschungsproblematik auf und konfrontiert sie zum anderen mit der Pragmatik des Theateralltags, dessen eigene Gesetzmäßigkeiten oftmals mit den Deutungsansätzen des Wissenschaftlers kollidieren. Neuartige Quellensorten und ein gegenüber früheren Jahrhunderten gesteigertes historisches Bewusstsein, das nun auch scheinbar ephemere Theaterarbeiten als Teilbereiche von Nachlässen bewahrt, erlauben zudem eine facettenreichere Sichtung schauspielmusikalischer Phänomene. Ursula Kramer greift dies exemplarisch auf, indem sie anhand dreier Regiebücher von Max Reinhardt zu seinen verschiedenen *Faust*-Inszenierungen nach Funktion und Rolle dieser spezifischen Textsorte fragt. Antworten ergeben sich aus der Gegenlektüre, der Analyse exemplarischer Passagen der musikalischen Realisierungen für die unterschiedlichen Produktionen: Anspruch des Regisseurs und konkrete Umsetzung durch die Musik liegen bisweilen weit auseinander, und manche nicht verwirklichte Idee Reinhardts lässt ihn als einen auch in musikalischer Hinsicht bislang ungenügend gewürdigten Theatermann erscheinen, der, wie die weite-

re Entwicklung der Schauspielmusik im 20. Jahrhundert zeigen sollte, seinen komponierenden Mitarbeitern bisweilen um Jahrzehnte voraus war. Noch am Ende des Jahrhunderts sollten Theaterschaffende von seinen (auch: klingenden) Visionen profitieren.

Die spezifische Triebfeder für den Theatermann Brecht war die politische Idee gesellschaftlicher Veränderungen durch die Kunst; Ingeborg Allihn durchmisst in ihrem Beitrag den Weg, den Brecht und Hanns Eisler in 27 Jahren und acht gemeinsamen Schauspielproduktionen gegangen sind. Exemplarisch wird eine dieser acht ganz unterschiedlichen kompositorischen Lösungen diskutiert: eine Musik, die als Teil in einem Kollektiv selbstständiger Künste als „Schmutz-aufwirblerin“ zu wirken hatte. Dass die Bühnenwerke von Peter Hacks zahlreiche musikalische Einlagen aufweisen, wurde bislang von der Forschung nicht thematisiert. Gunther Nickel nimmt dies zum Anlass, um in größerem Kontext auf die generelle Affinität von Hacks zur Musik hinzuweisen und so zu weiterer Forschung anzuregen.

Der Beitrag von Constanze Schuler zeigt exemplarisch, wie wichtig und erhellend interdisziplinäre Perspektiven für die Erforschung von Schauspielmusik insbesondere des 20. Jahrhunderts sind. Anhand von drei höchst unterschiedlich situierten Produktionen der Jahre 1922, 1974 und 2012, denen jedoch allen experimentelle Raumlösungen eigen sind, wird bei unterschiedlichem methodischem Ansatz der Erkenntnisgewinn deutlich, der durch die Analyse des Zusammenspiels von Musik und jeweiligem Raum entsteht. Im Zentrum der Ausführungen von Martin Zenck steht das (re)produzierende Wirken von Pierre Boulez als musikalischem Leiter der Pariser Theatertruppe Compagnie Renaud-Barrault, dem nach Jahren der Einstudierung fremder Werke schließlich selbst der Kompositionsauftrag zur *Orestie* erteilt wurde. Zu den wichtigsten Erkenntnissen aus der Diskussion des umfangreichen Notentextes gehört die der hierarchielosen Gattungsinterferenz: Für Boulez ist Schauspielmusik als angewandte Kunst keinesfalls ein nachrangiges Genre, sondern profitiert von Kompositionsprozessen der autonomen Musik gleichermaßen wie sie ihrerseits ideenstiftend in jene hinüber wirkt. Vor dem Hintergrund der jüngeren Hörspielgeschichte und ihrem speziellen Verhältnis zur Musik thematisiert Michael Bachmann Johan Simons' Produktion von Aischylos' *Perser* (2011), die im Anschluss an ihre Präsentation im Theater auch eine Rundfunk-Ausstrahlung erlebte. Mit dem Verlust der optischen Dimension der Bühne geht nach Bachmann ein Entgrenzungsprozess des Mediums Musik einher, der dieses nun stärker an die Sprache annähert. Gleichsam symptomatisch für die innovativen Optionen von Musik im Theater des 20./21. Jahrhunderts beschließt Friedemann Kreuders suggestive Beschreibung eines Berliner Theaterabends von Jörg Laue und der

LOSE COMBO die Reihe der Beiträge: Eine Performance, bei der die Musik diametral zu ihrer angestammten, unterstützenden und steigernden Funktion eines Dramas steht, indem sie ihrerseits als Matrix des Abends fungiert, kehrt einstige Kräfteverhältnisse vollends um.

Damit scheint der denkbar weiteste Weg ausgeschritten, der einst mit Gesangseinlagen begonnen hatte und über die affirmative Medienkombination einer auch die selbständige Instrumentalmusik einbeziehenden Theaterepoche illusionistischer Prägung weitergeführt wurde, bis schließlich die Diversifizierung des 20. Jahrhunderts neben der Fortschreibung bewährter Funktionen auch solche Alternativmodelle entwickelte, die sich den angestammten Hierarchisierungen vollends entziehen.

Dazwischen liegt ein schier unüberschaubares Potential individueller Theaterabende mit unterschiedlichster Verwendung musikalischer Anteile; im Rahmen der hier dokumentierten Tagungsbeiträge von 2012 konnten bestenfalls exemplarische Schlaglichter gesetzt werden. Nicht zuletzt die auch in den einzelnen Beiträgen aufgewiesenen Forschungsoptionen mögen dazu einladen, sich diesem gleichermaßen spannenden wie schillernden Gegenstand im jeweils individuell und immer wieder neu zu verhandelnden interdisziplinären Diskurs zu nähern.

Dass der Workshop und der nun vorliegende Sammelband zustande kamen, ist zuallererst den Autorinnen und Autoren zu verdanken. Der Dank gilt aber auch dem (damaligen) Musikwissenschaftlichen Institut (heute: Institut für Kunstgeschichte und Musikwissenschaft) – stellvertretend seien sein Leiter, Prof. Dr. Klaus Pietschmann, und Gabriele Maurer genannt – für ideelle und praktische Unterstützung insbesondere im Zusammenhang mit der Durchführung der Veranstaltung 2012. Benjamin Scholten und Frederic von Vlahovits haben wertvolle Hilfe bei der Organisation des Workshops bzw. bei der Einrichtung des Bandes für den Druck geleistet.

Finanziell gefördert wurde sowohl der Workshop als auch die Publikation der Beiträge durch die großzügige Unterstützung des Forschungsschwerpunktes Historische Kulturwissenschaften der Johannes Gutenberg-Universität Mainz. Die Strecker-Stiftung Mainz ermöglichte schließlich die Wiedergabe der Abbildungen in optimierter Farbqualität.

Allen Personen und Institutionen gilt mein herzlicher Dank.
